# Supplementary material for: Thickness-tunable solvothermal synthesis of BiOCl nanosheets and their photosensitization catalytic performance
Source: Royal Society of Chemistry journal article supplement (doi:10.1039/c4nj01591f), 2014-11-27
Supplement: c4nj01591f1.pdf [file c4nj01591f1.pdf]

## Electronic Supplementary Information for

Thickness-tunable solvothermal synthesis of BiOCl nanosheets and their photosensitization catalytic performance

Fan Tian,<sup>a,§</sup> Yafang Zhang,<sup>a,§</sup> Guangfang Li,<sup>a</sup> Yunling Liu,<sup>b</sup> Rong Chen<sup>a,\*</sup>

<sup>a</sup> School of Chemistry and Environmental Engineering, Wuhan Institute of Technology, Xiongchu Avenue, Wuhan, 430073, PR China.

<sup>b</sup> State Key Laboratory of Inorganic Synthesis and Preparative Chemistry, College of Chemistry, Jilin University, Changchun, 130012, PR China.

§ These authors make equal contribution to this work.

\* Corresponding author: Prof. R. Chen, E-mail: [rchenhku@hotmail.com](mailto:rchenhku@hotmail.com)

Tel.: (+86)13659815698; fax: (+86)2787195671.

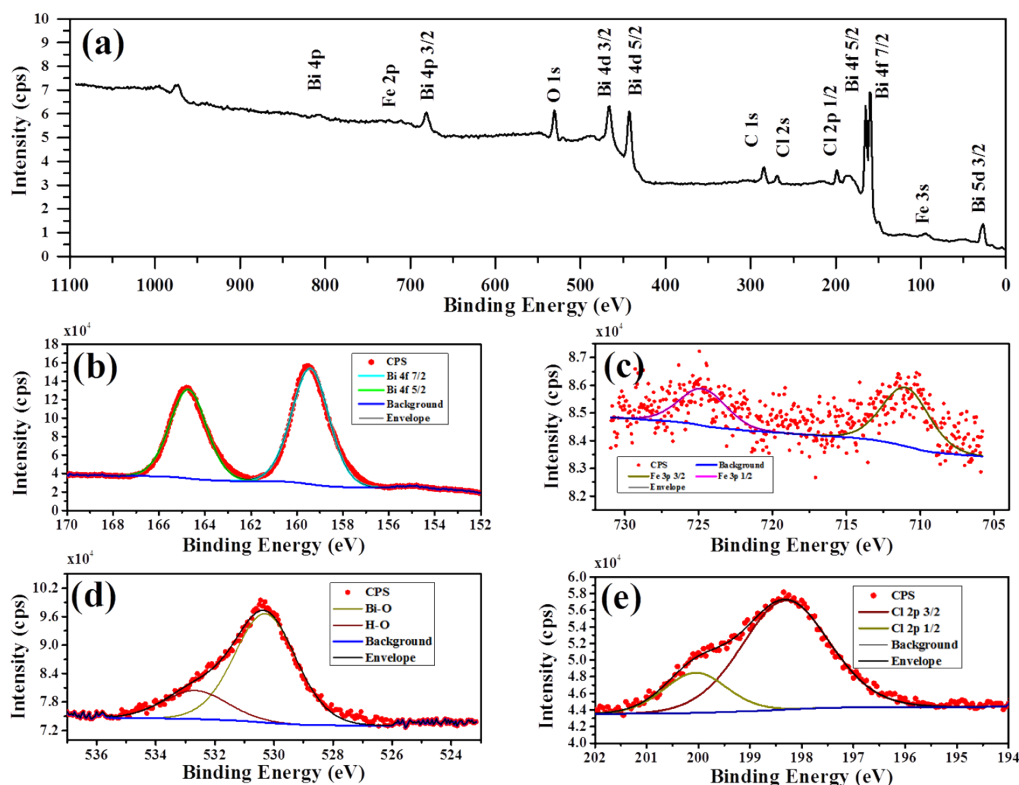

Fig. S1 XPS spectra recorded for (a) survey, (b) Bi 4f, (c) Fe 3p, (d) O 1s and Cl 2p of BiOCl product fabricated from 1 mmol FeCl<sub>3</sub> (S1).

In the XPS survey spectrum of BiOCl product fabricated from 1 mmol FeCl<sub>3</sub> (S1), the signal of Bi, O, Cl and Fe are clearly observed (a), indicating the co-exist of those elements. In the high resolution XPS spectrum of Bi 4f (a), two peaks centered at 164.7 and 159.4 eV are ascribed to Bi 4f 3/2 and Bi 4f 5/2, respectively. In the high resolution XPS spectrum of Fe 2p (b), peaks centered at 711.1 and 724.8 eV are ascribed to the 2p 5/2 and 2p 3/2 of Fe<sup>3+</sup> [1]. The relatively low intensity of the signal indicates the low concentration of the Fe species in the product. High resolution O 1s and Cl 2p spectra of the BiOCl product are presented in figure (d) and (e) respectively. Both of the obtained data can be deconvoluted into two peaks. The signals centered at 532.7, 530.25, 200.0 and 198.27 eV are attributed to O 1s of H-O, O 1s of Bi-O, Cl 2p 1/2 and Cl 2p 3/2, respectively [2-3].

## Reference

- [1]. K. Karthikeyan; S. Amaresh; S. N. Lee; V. Aravindan; Y. S. Lee, *Chem. Asian J.* 2014, **9**, 852-857.
- [2]. G. Cheng; J. Xiong; F. J. Stadler, *New J. Chem.* 2013, **37**, 3207-3207.
- [3]. L. Ye; L. Tian; T. Peng; L. Zan, *J. Mater. Chem.* 2011, **21**, 12479-12479.
